# Supplementary material for: Hg(II) Coordination Polymers Based on N,N’-bis(pyridine-4-yl)formamidine
Source: MDPI journal article supplement (doi:10.3390/polym8040137), 2016-04-11
Supplement: s1 [file s1]

# Supplementary Materials: Hg(II) Coordination Polymers Based on *N,N'*-bis(pyridine-4-yl)formamide

Wayne Hsu, Xiang-Kai Yang, Pradhumna Mahat Chhetri and Jhy-Der Chen

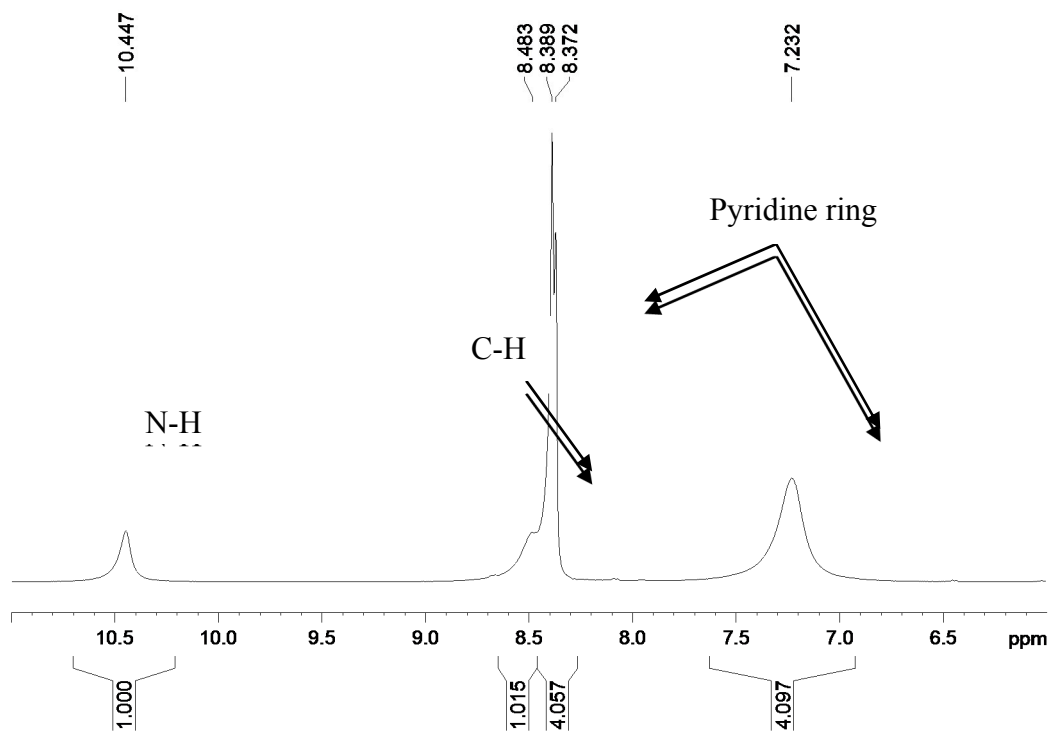

Figure S1. The  $^1\text{H}$  NMR spectrum of 4-Hpyf.

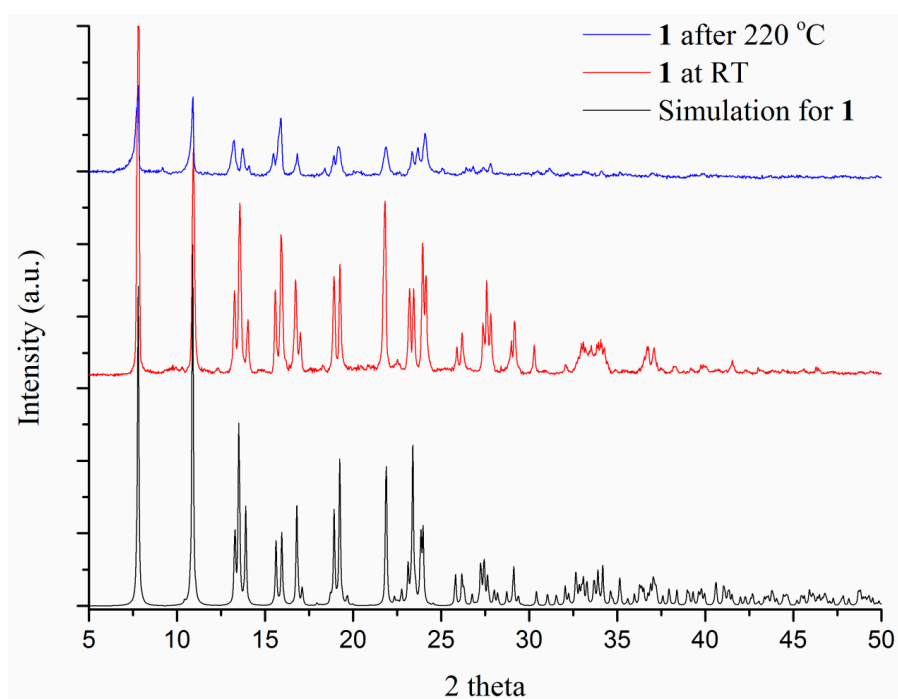

Figure S2. The PXRD patterns for complex 1.

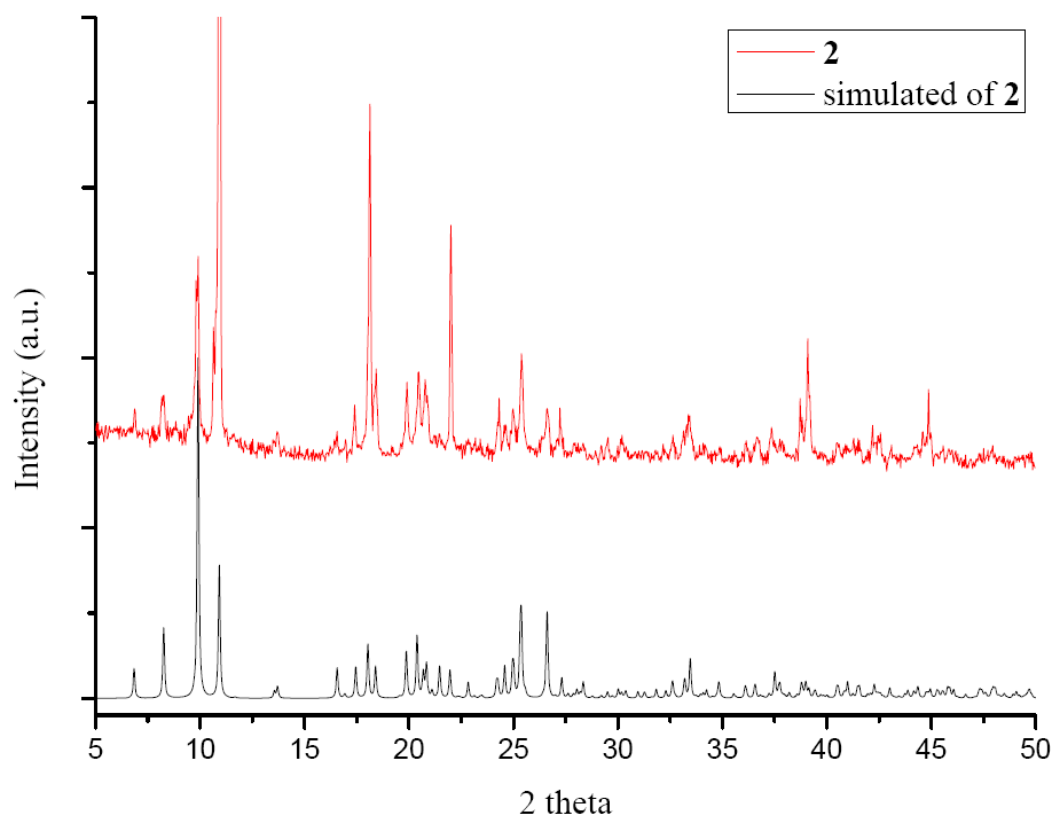

Figure S3. The PXRD patterns for complex 2.

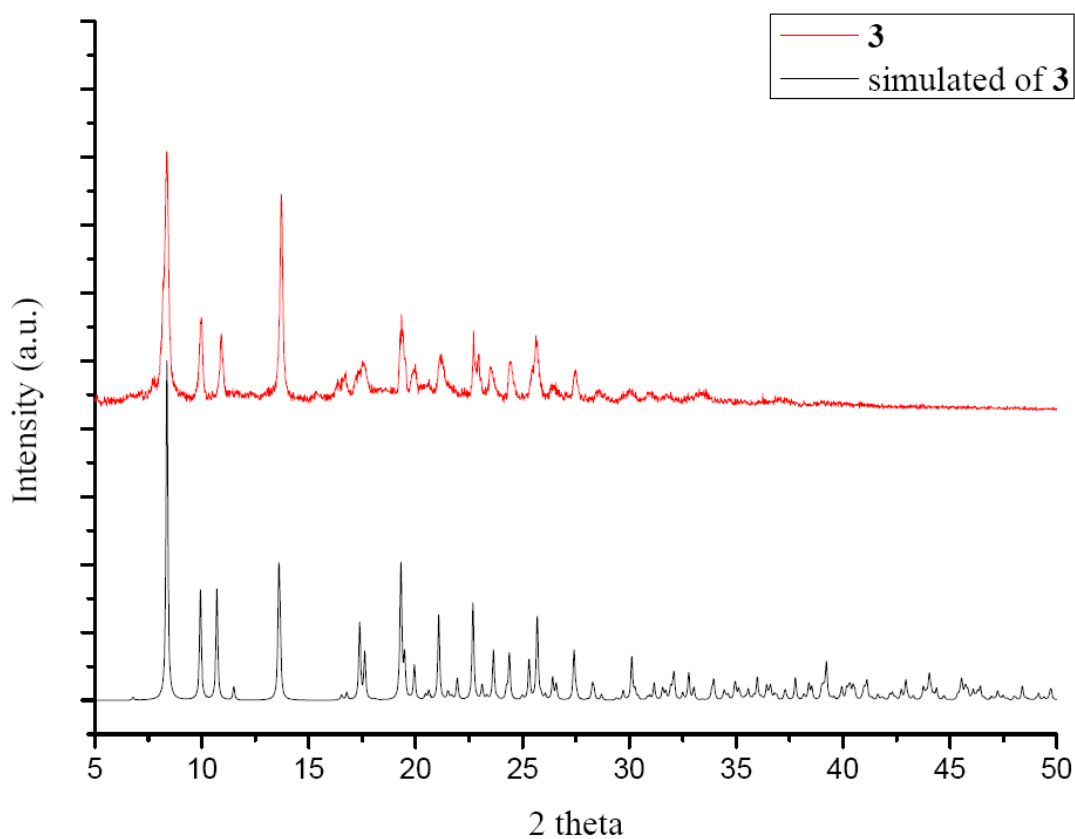

Figure S4. The PXRD patterns for complex 3.

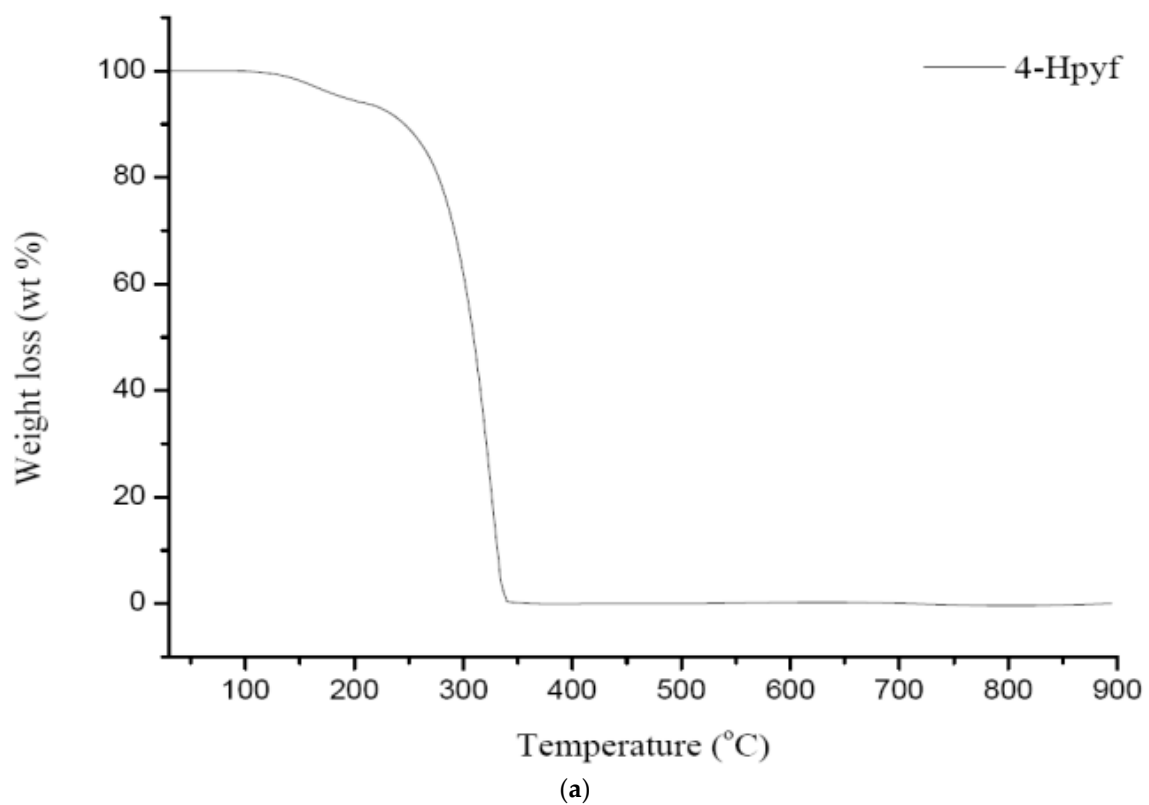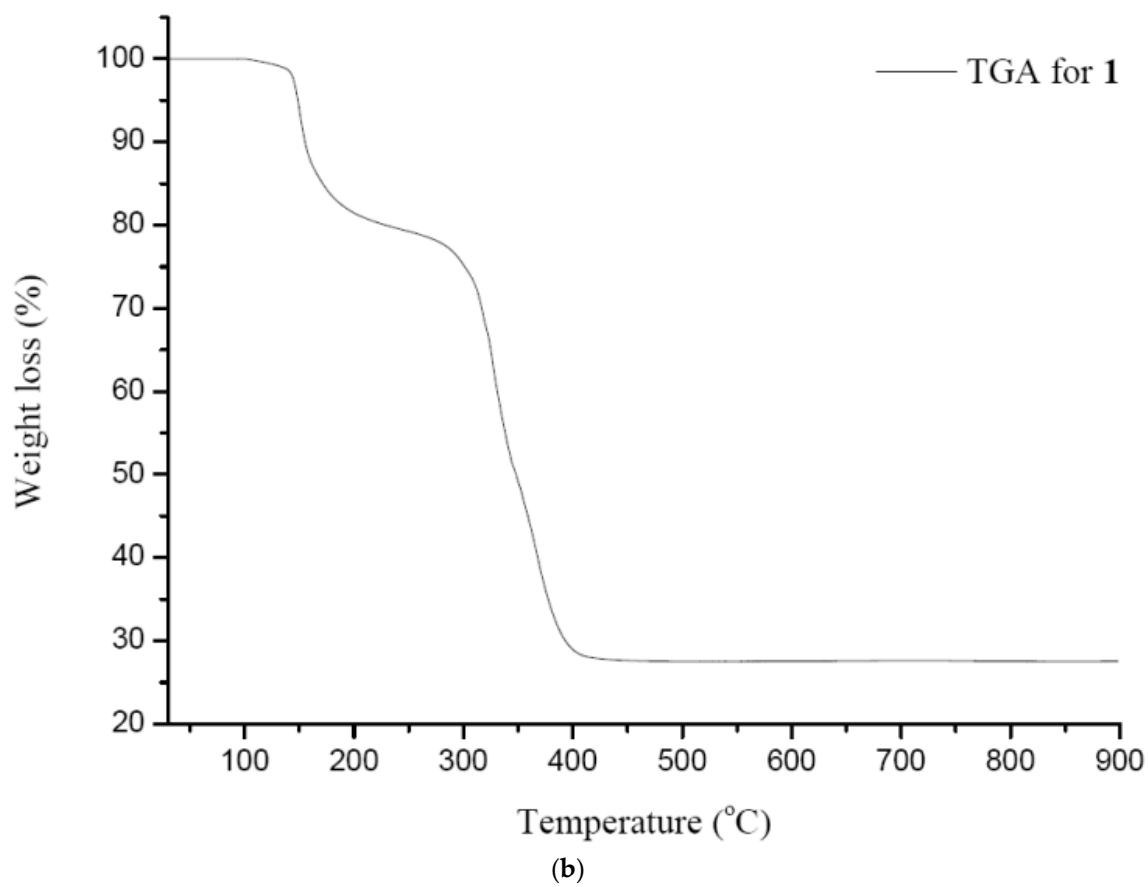

Figure S5. TGA curves for (a) 4-Hpyf and (b) 1.

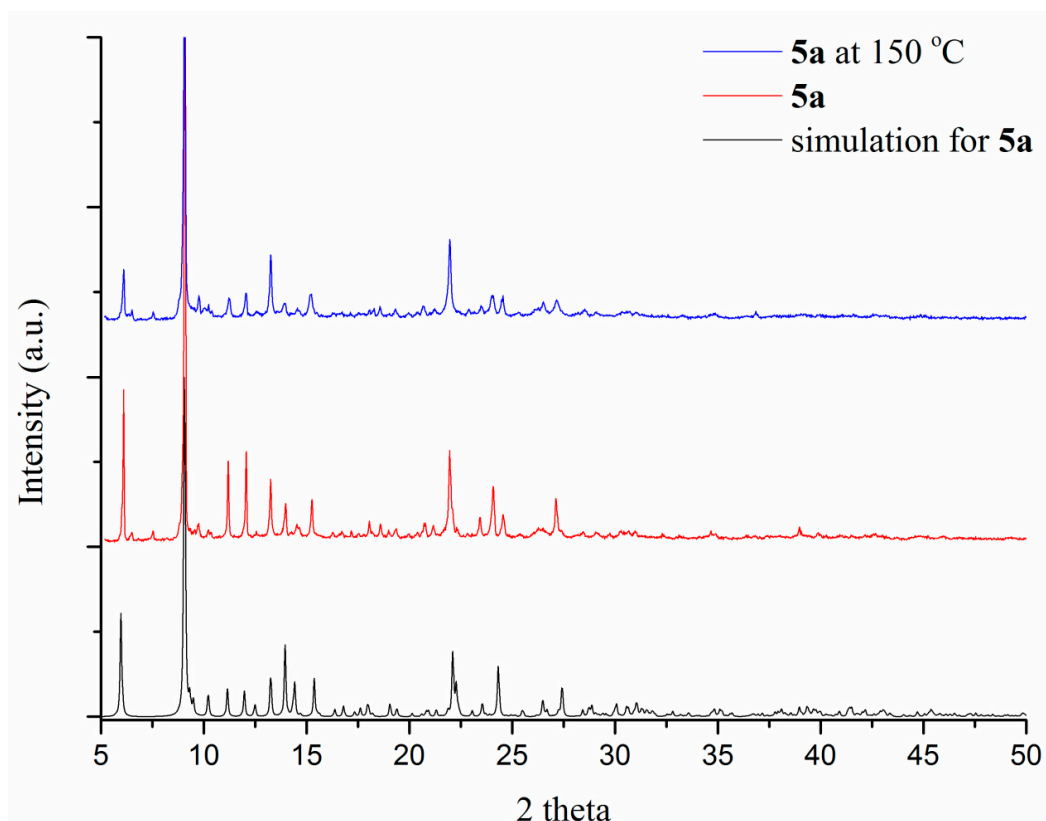

Figure S6. Simulated, experimental and 150 °C powder XRD patterns for 5a.

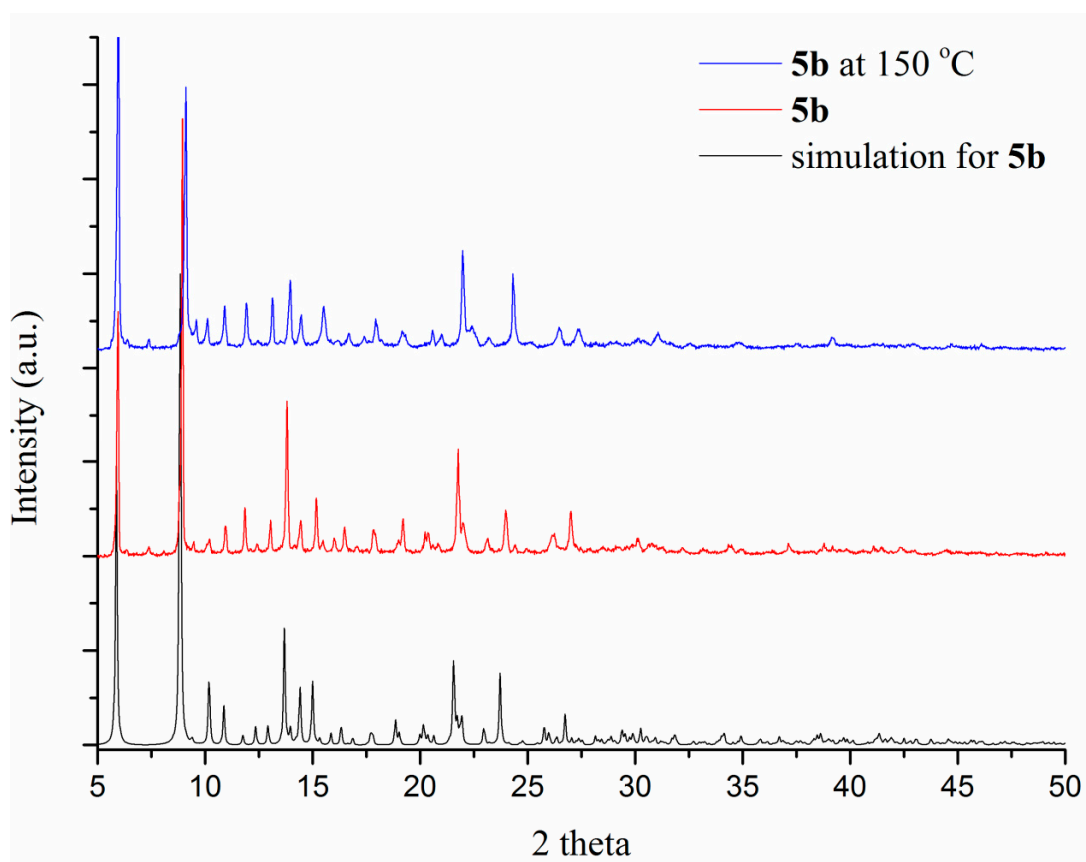

Figure S7. Simulated, experimental and 150 °C powder XRD patterns for 5b.

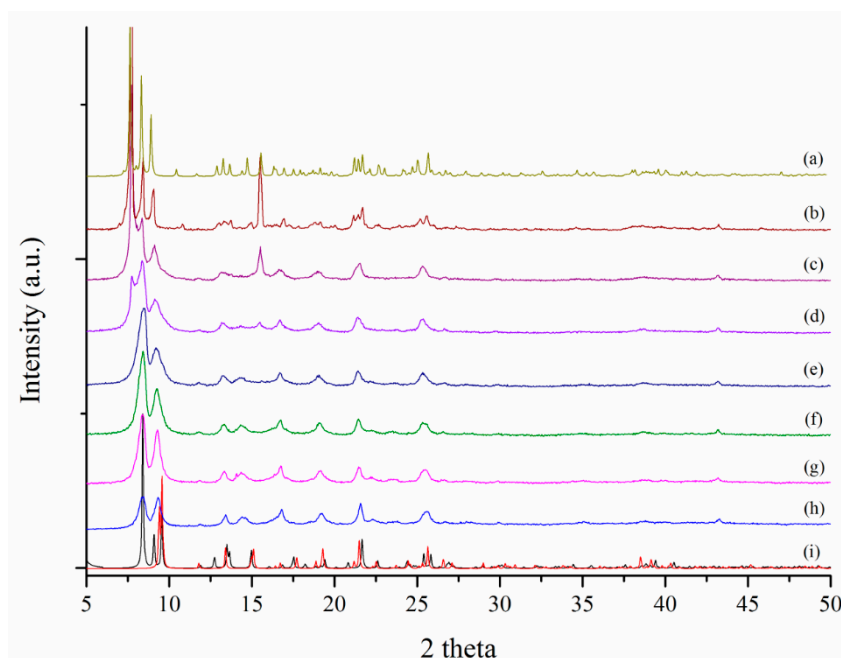

**Figure S8.** (a) Simulated PXRD patterns for 4 and patterns at (b) 30 °C, (c) 90 °C, (d) 100 °C, (e) 120 °C, (f) 160 °C, (g) 200 °C, (h) 240 °C. (i) Combined simulated patterns for *syn*-[Cu(4-pyf)]<sub>n</sub>.

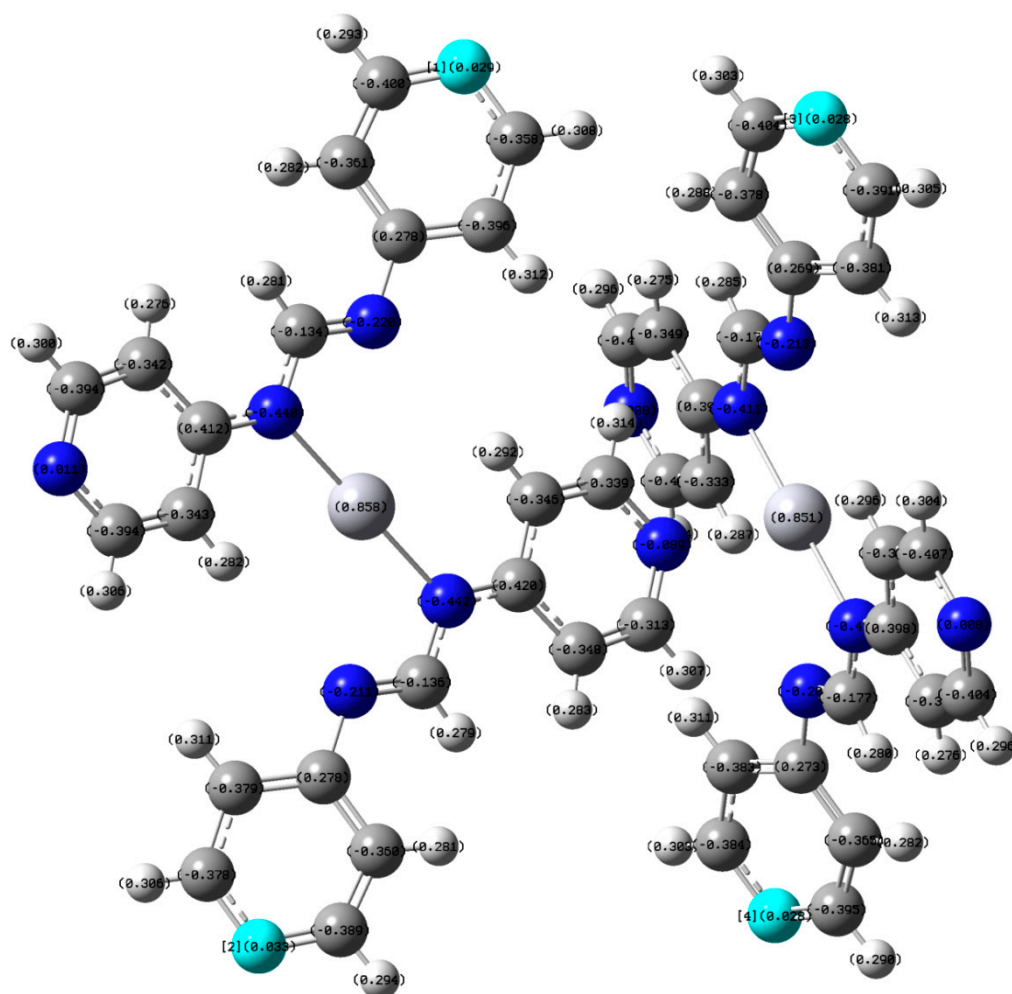

**Figure S9.** The Mulliken charge in asymmetric units for complex 1. The outward dangling pyridyl atoms are shown with light blue color.

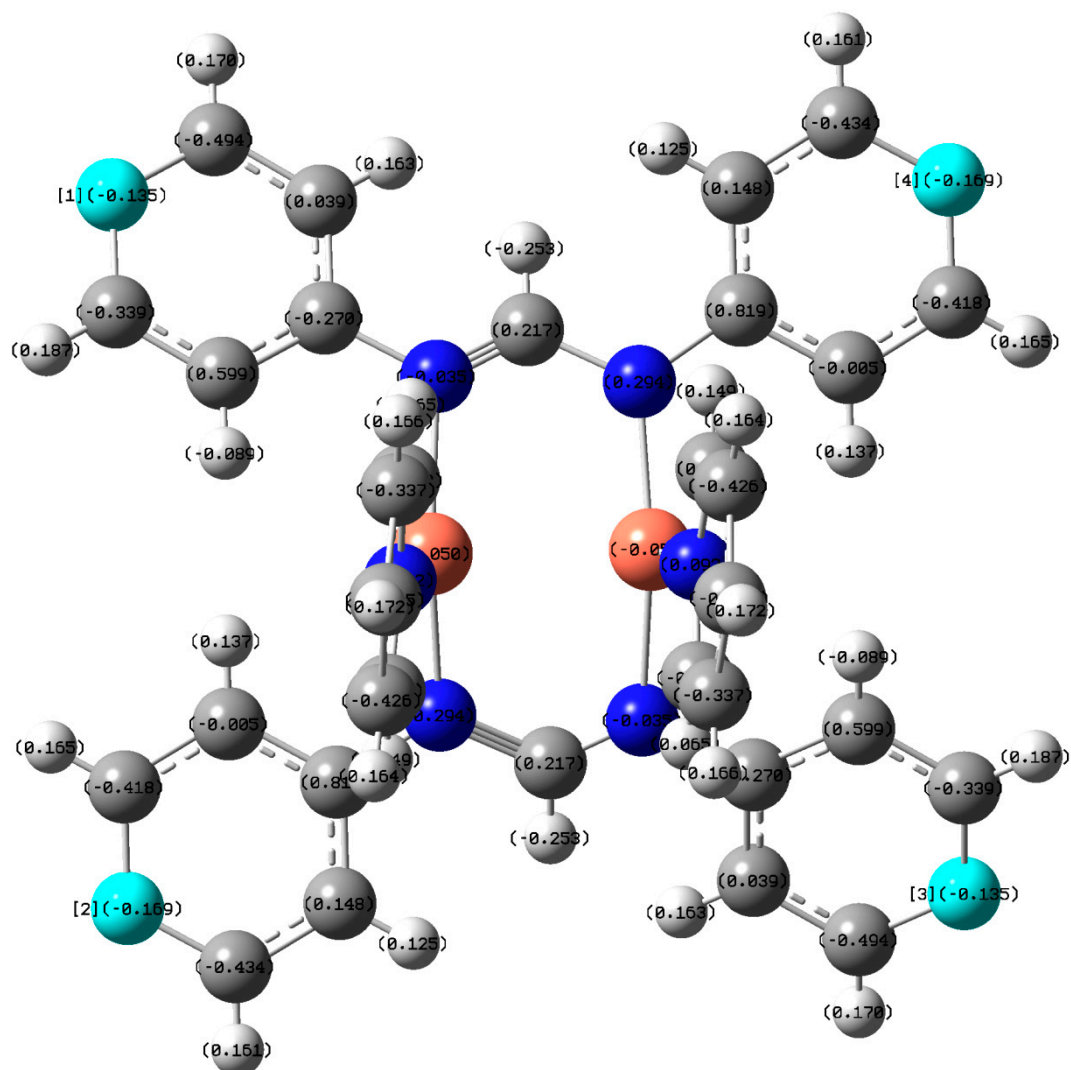

**Figure S10.** The Mulliken charge in asymmetric units for complex 4. The outward dangling pyridyl atoms are shown with light blue color.

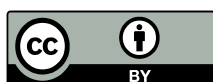

© 2016 by the authors; licensee MDPI, Basel, Switzerland. This article is an open access article distributed under the terms and conditions of the Creative Commons by Attribution (CC-BY) license (<http://creativecommons.org/licenses/by/4.0/>).
